# Supplementary material for: Near-Infrared Light Exposure Triggers ROS to Downregulate Inflammatory Cytokines Induced by SARS-CoV-2 Spike Protein in Human Cell Culture
Source: MDPI journal article supplement (doi:10.3390/antiox12101824), 2023-10-02
Supplement: s1 [file s1]

## Supplementary Materials

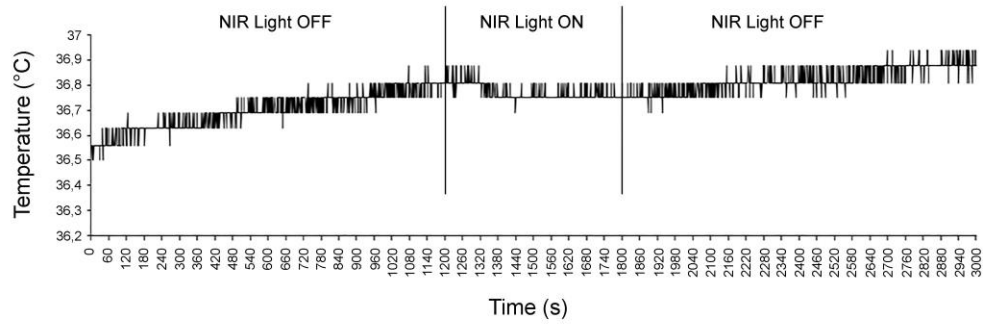

Fig. S1. Measure of real-time cell temperature fluctuation during NIR exposure. Temperature have been measured every second by a waterproof temperature sensor immersed in the cell culture medium. Temperature recording began 20 min before NIR exposure, during the 10 min exposure and continued for 20 min after the end of exposure.

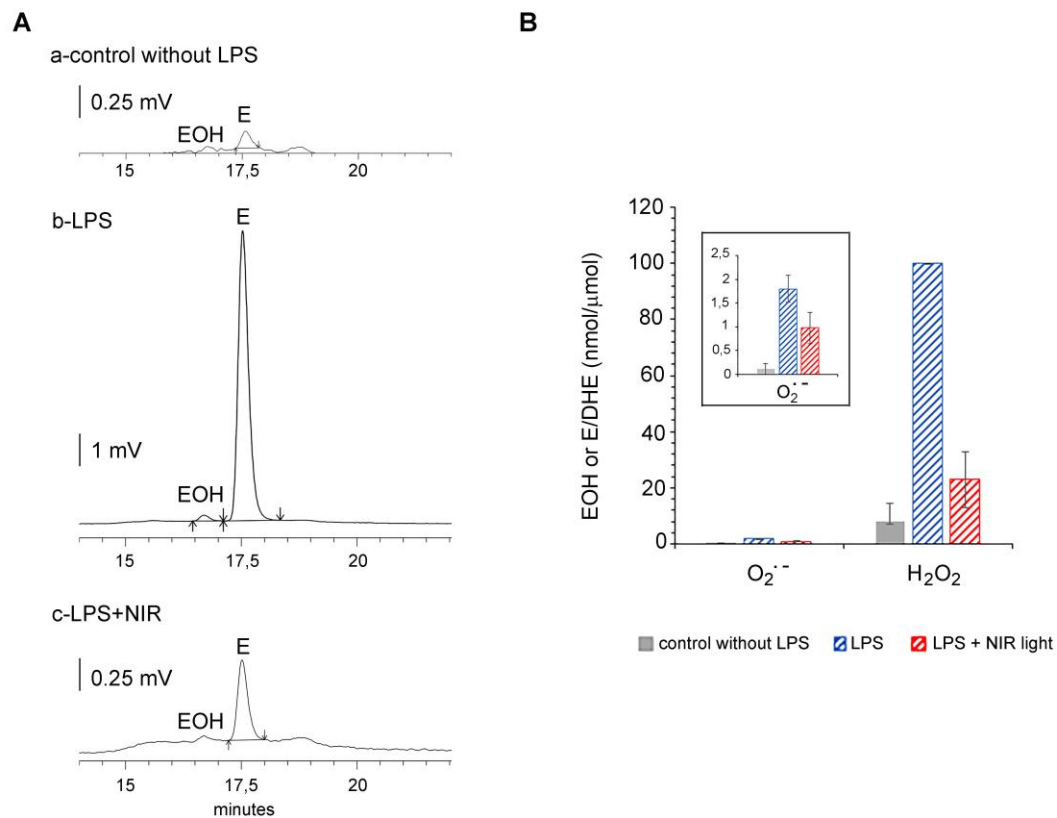

**Fig. S2.** HPLC analysis of ROS products after NIR light exposure. After activation by LPS for 24h and 10 min exposure to NIR light, HEK-Blue™-hTLR4 cells were maintained in PBS and incubated with 50  $\mu$ M DHE for 30 min. Cells were then harvested in acetonitrile, dried, resuspended in PBS/DTPA and analyzed by HPLC. (A) representative chromatogram profiles of EOH and E (Ethidium) separation for (A-a) control, (A-b) LPS or (A-c) LPS +NIR light conditions (B) Quantification of EOH/DHE (that reflect  $O_2^{\cdot-}$  concentration) and E/DHE (that reflect  $H_2O_2$  concentration) ratio. n=3, \*p < 0.1; \*\* p < 0.01; \*\*\* p < 0.001.

**Table S1.** List of primers used for quantitative real-time PCR.

| Species | Genes                             | Gene accession number | Forward Primer 5'-3'        | Reverse Primer 5'-3'     |
|---------|-----------------------------------|-----------------------|-----------------------------|--------------------------|
| Human   | <b>IL-6</b>                       | NM_000600.5           | GGCTGCAGGACATGACAACT        | ATCTGAGGTGCCCATGCTAC     |
|         | <b>IL-8</b>                       | NM_000584.4           | CCACCGGAAGGAACCATCTC        | GGGGTGGAAAGGTTTGGAGT     |
|         | <b>TNF-<math>\alpha</math></b>    | NM_000594.4           | CAAGGACAGCAGAGGACCAG        | TGGCGTCTGAAGGTTGTTTT     |
|         | <b>IFN-<math>\alpha</math></b>    | NM_024013.3           | AGAATCACTCTCTATCTGAAAGAGAAG | TCATGATTTCTGCTCTGACAACCT |
|         | <b>IFN-<math>\beta</math></b>     | NM_002176.4           | CGCCGCATTGACCATCTA          | GACATTAGCCAGGAGGTTCT     |
|         | <b>IFN-<math>\gamma</math></b>    | NM_000619.3           | CTAATTATTCGGTAACTGACTTGA    | ACAGTTCAGCCATCACTTGGA    |
|         | <b>IL-10</b>                      | NM_000572.3           | CGCTGTCATCGATTCTTCCCT       | AGGCATTCTTCACCTGCTCCAC   |
|         | <b>TGF-<math>\beta</math></b>     | NM_000660.7           | ACTATTGCTTCAGCTCCACGGA      | AGTCAATGTACAGCTGCCGCA    |
|         | <b>pro-IL-1<math>\beta</math></b> | NM_000576.3           | CCTGTGGCCTTGGGCCTCAA        | GGTGCTGATGTACCAGTTGGG    |
|         | <b>CAT</b>                        | NM_001752.4           | ACCCTCGTGGGTTTGCAGTGA       | CGAGCACGGTAGGGACAGTTCA   |
|         | <b>GPX1</b>                       | NM_000581.4           | TGGGCATCAGGAGAACGCCA        | GGGGTCGGTCATAAGCGCGG     |
|         | <b>GPX3</b>                       | NM_002084.5           | CTGACGGGCCAGTACATTGA        | TCCACCTGGTCGGACATACT     |
|         | <b>GSR</b>                        | NM_000637.5           | AGGAGCTGGAGAACGCTGGC        | CAATGGCCCAGAGCAGGCA      |
|         | <b>GAPDH</b>                      | NM_002046.7           | TGCACCACCAACTGCTTAGC        | GGCATGGACTGTGGTCATGAG    |
